# Supplementary material
Source: PubMed Central journal article supplement (PMC4342584)
Supplement: supp_128.5.1034_JCS162552.pdf [file supp_128.5.1034_JCS162552.pdf]

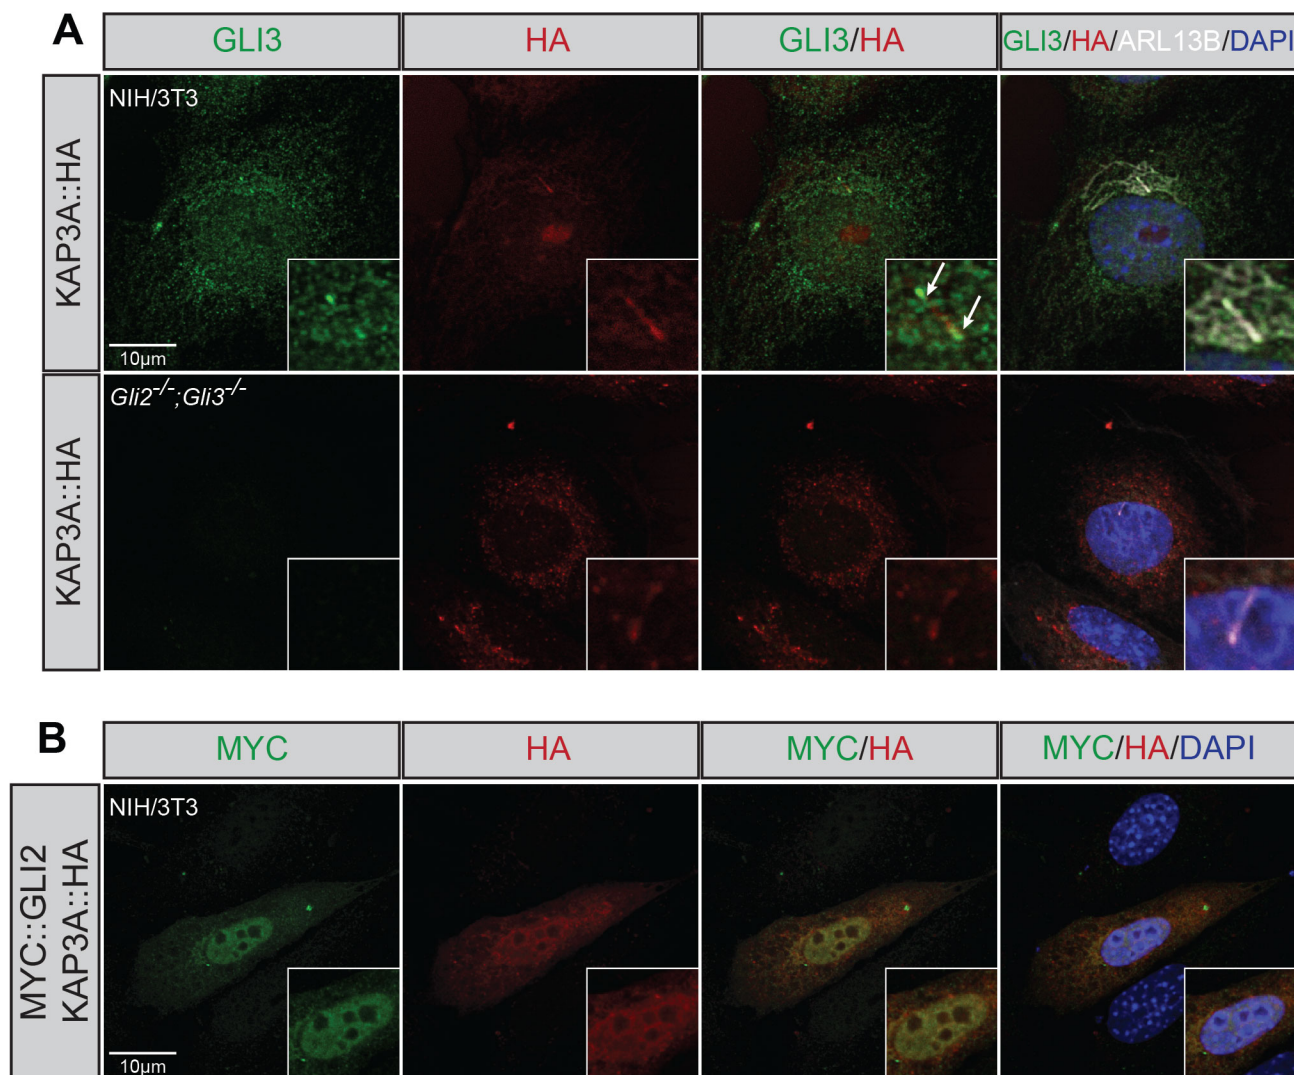

**Figure S1. KAP3A co-localizes with mammalian GLI proteins.**

(A) Antibody detection of endogenous GLI3 in NIH/3T3 cells (top row; green) or *Gli2<sup>-/-</sup>; Gli3<sup>-/-</sup>* MEFs (bottom row; green) expressing HA-tagged KAP3A (KAP3A::HA). Primary cilia are identified using antibodies directed against ARL13B (ARL13B; grey). DAPI denotes nuclei (blue). Insets represent high magnification images of primary cilia. Arrows indicate localization of GLI3 in primary cilia. Scale bar, 10µm. (B) Antibody detection of MYC::GLI2 (green) and KAP3A::HA (red) in NIH/3T3 cells. DAPI (blue) identifies nuclei. Scale bar, 10µm.

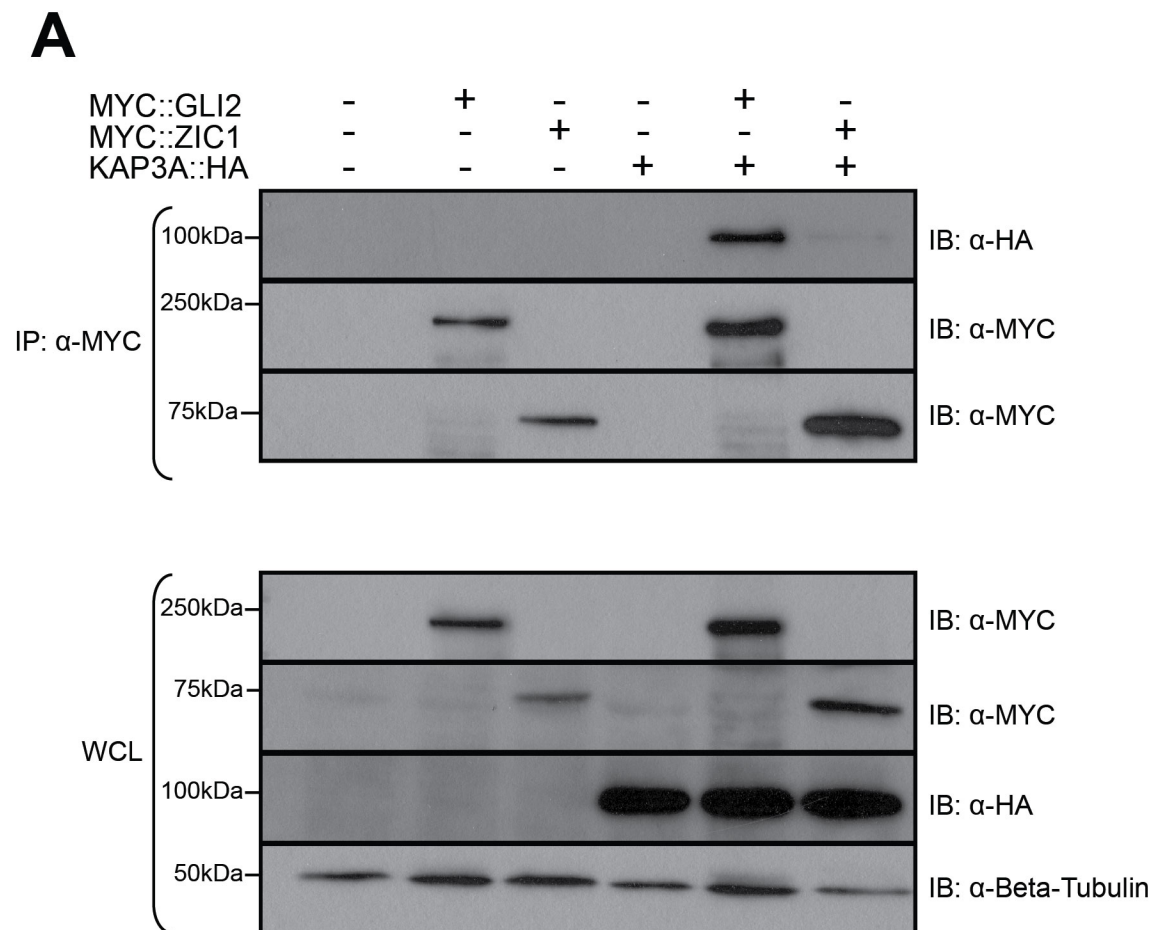

**Figure S2. KAP3A does not interact with ZIC1.**

(A) Immunoprecipitation of MYC-tagged GLI2 (MYC::GLI2) or MYC-tagged ZIC1 (MYC::ZIC1) from COS-7 cells expressing HA-tagged KAP3A (KAP3A::HA). Immunoprecipitates (IP) and whole cell lysates (WCL) were subjected to SDS-PAGE and western blot analysis (IB) using antibodies directed against MYC ( $\alpha$ -MYC) and HA ( $\alpha$ -HA). Antibody detection of Beta-Tubulin ( $\alpha$ -Beta-Tubulin) was used to confirm equal loading across lanes. The molecular weights (in kDa) of protein standards are indicated at the left of each blot.

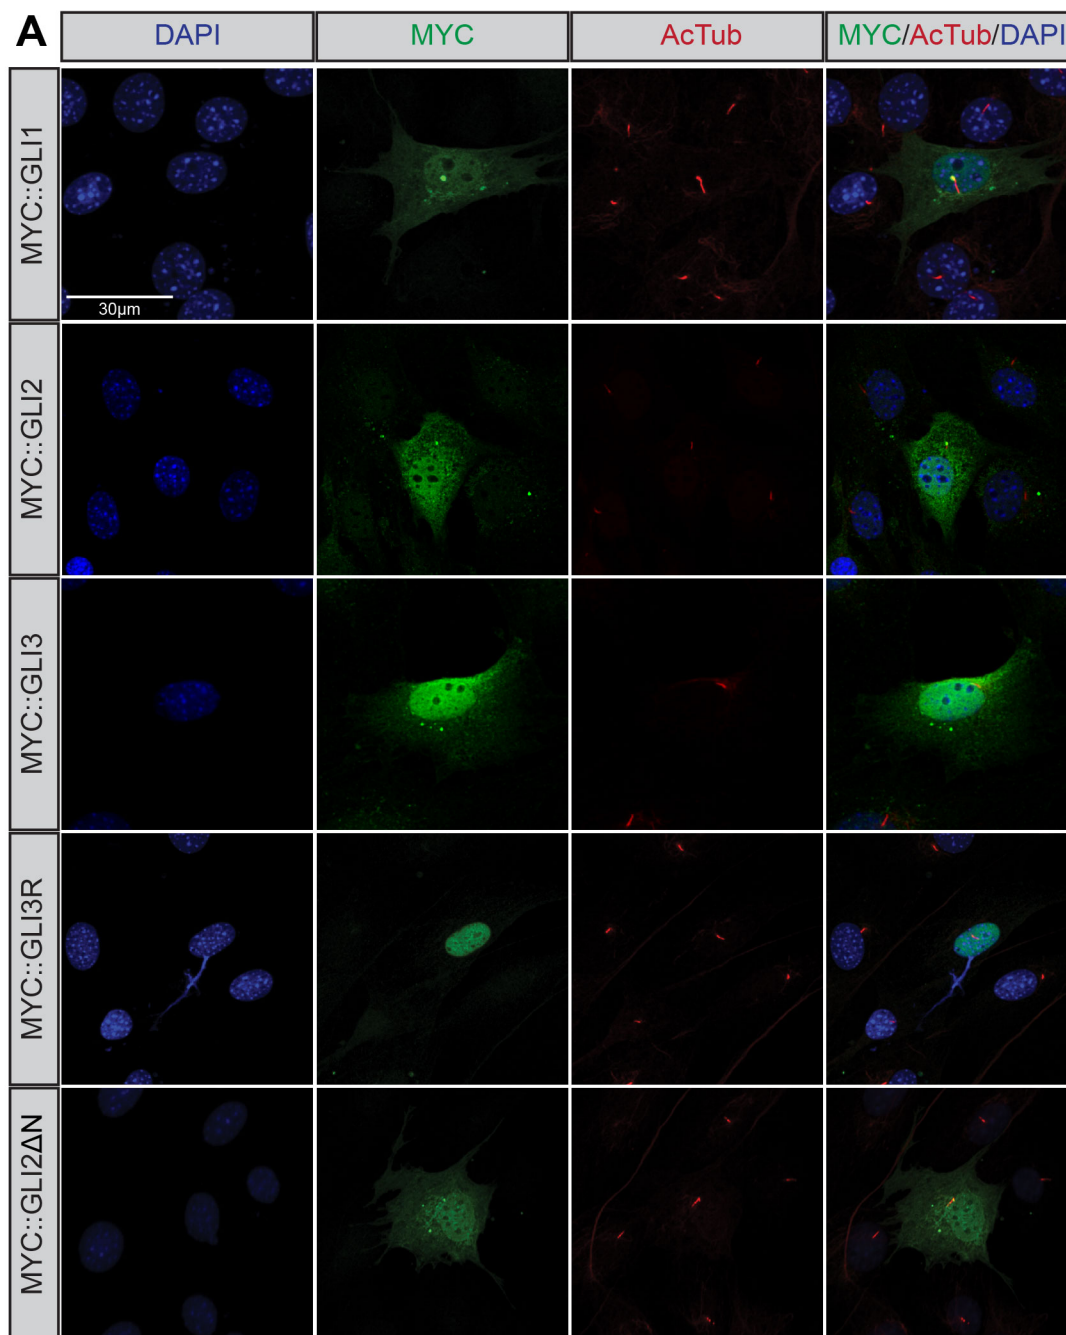

**B**

|               | Nucleus | Cytoplasm | Cilium |
|---------------|---------|-----------|--------|
| <b>GLI1</b>   | 17/20   | 20/20     | 12/20  |
| <b>GLI2</b>   | 18/20   | 17/20     | 11/20  |
| <b>GLI3</b>   | 20/20   | 11/20     | 2/20   |
| <b>GLI3R</b>  | 20/20   | 1/20      | 0/20   |
| <b>GLI2ΔN</b> | 20/20   | 20/20     | 9/20   |

**Figure S3. Subcellular localization of MYC-tagged GLI constructs in NIH/3T3 cells.**

(A) Localization of MYC::GLI1, MYC::GLI2, MYC::GLI3, MYC::GLI3R, and MYC::GLI2ΔN in NIH/3T3 cells (green). Primary cilia are identified using antibodies directed against acetylated tubulin (AcTub; grey). DAPI denotes nuclei (blue). (B) Summary of subcellular localization of MYC-tagged GLI constructs (N=20 cells). Scale bar, 30μm.

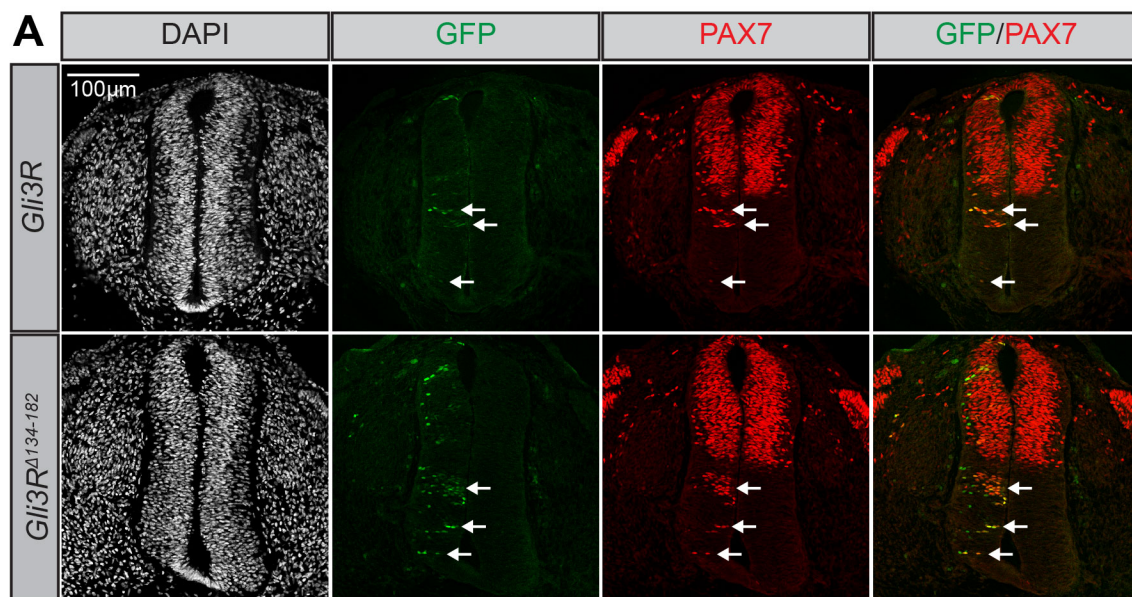

**Figure S4. KAP3 binding does not alter GLI3R activity in vivo.**

(A) Transverse sections of Hamburger-Hamilton stage 21-22 chicken neural tubes electroporated with *Gli3R* (top row) or *Gli3<sup>Δ134-182</sup>* (bottom row) stained with antibodies raised against PAX7 (red). GFP expressing cells (green) denote electroporated cells. DAPI marks nuclei. Arrows indicate ectopic PAX7 expression. Scale bar, 100μm.
